# Supplementary material
Source: PubMed Central journal article supplement (PMC4277588)
Supplement: AEM.03104-14_zam999105957so1.pdf [file AEM.03104-14_zam999105957so1.pdf]

## Supplemental Material

### A molecular toolbox for the genetic manipulation of the stalked budding bacterium *Hyphomonas neptunium*

Alexandra Jung<sup>1,2</sup>, Sabrina Eisheuer<sup>1,2</sup>, Emöke Cserti<sup>1,2</sup>, Oliver Leicht<sup>1,2</sup>, Wolfgang Strobel<sup>1,2</sup>, Andrea Möll<sup>1,2</sup>, Susan Schlimpert<sup>1,2</sup>, Juliane Kühn<sup>1,2</sup> and Martin Thanbichler<sup>1,2,3</sup>

<sup>1</sup> Max Planck Institute for Terrestrial Microbiology, <sup>2</sup> Faculty of Biology, Philipps-Universität, and <sup>3</sup> LOEWE Center for Synthetic Microbiology, Marburg, Germany

## SUPPLEMENTAL METHOD

### Operon mapping

An overnight culture of *H. neptunium* was diluted into MB medium. When the culture reached an OD<sub>600</sub> of approx. 0.5, CuSO<sub>4</sub> was added to a final concentration of 0.5 mM. After another 30 min of incubation, a 2 ml sample was taken and immediately centrifuged at 9,500 g for 10 min. To extract total RNA, the sediment was resuspended in 1 ml TRIzol® reagent (Invitrogen, Germany) per 1 x 10<sup>7</sup> bacterial cells. Cells were lysed by repeated up-and-down pipetting and incubated for 10 min at 65°C. After the addition of 200 µl chloroform per 1 ml TRIzol® reagent, the sample was mixed by shaking the tube vigorously by hand and was then incubated at room temperature for 5 min with agitation. The mixture was then transferred to a phase-lock tube (5PRIME, Germany) and centrifuged for 15 min at 12,000 g and 4°C. The upper, aqueous phase was transferred to a fresh tube, and the RNA was purified using the PureLink™ RNA Mini Kit (Invitrogen, Germany) according to the manufacturer's instructions. Contaminating DNA was digested using the Turbo DNA-free Kit (Ambion). Total RNA was reverse-transcribed into cDNA using the Revert Aid™ H Minus First Strand cDNA Synthesis Kit (Fermentas, Germany) according to manufacturer's instructions. To test for genomic DNA contamination, a control without reverse transcriptase was prepared for every cDNA synthesis reaction. Subsequently, PCR reactions with different primer pair combinations (see Figure S5A and Table S1) were performed with cDNA as a template. In addition, a positive control reaction with genomic DNA as a template was performed for every primer pair.

## SUPPLEMENTAL TABLE

Table S1. Oligonucleotides used for operon mapping.

| Name                 | Sequence                     |
|----------------------|------------------------------|
| HNE_1483-1484 fw     | gcggtgcgggggtgtctgccttcg     |
| HNE_1483-1484 rv     | cgggggtcaactggaaagcctcaactgg |
| HNE_1484-1485 fw     | gcagcagagcaggcgcgtcatcac     |
| HNE_1484-1485 rv     | agcctgccgaacgcctgtcctttgatg  |
| HNE_1485-1486 fw     | ggatgagcgggcccgggcagggttc    |
| HNE_1485-1486 rv     | ggctgggacgcaatgacgatggacttc  |
| HNE_1482-1483 fw_neu | ctcggccagcaggaactcgggataaag  |
| HNE_1482-1483 rv     | gccctgtcttctgtctccgtgatcgc   |
| HNE_1486-1487 fw     | taggggcgtgatcgattgtggctttg   |
| HNE_1486-1487 rv     | tcaatgcaataaccggccttctcaac   |

## SUPPLEMENTAL FIGURES

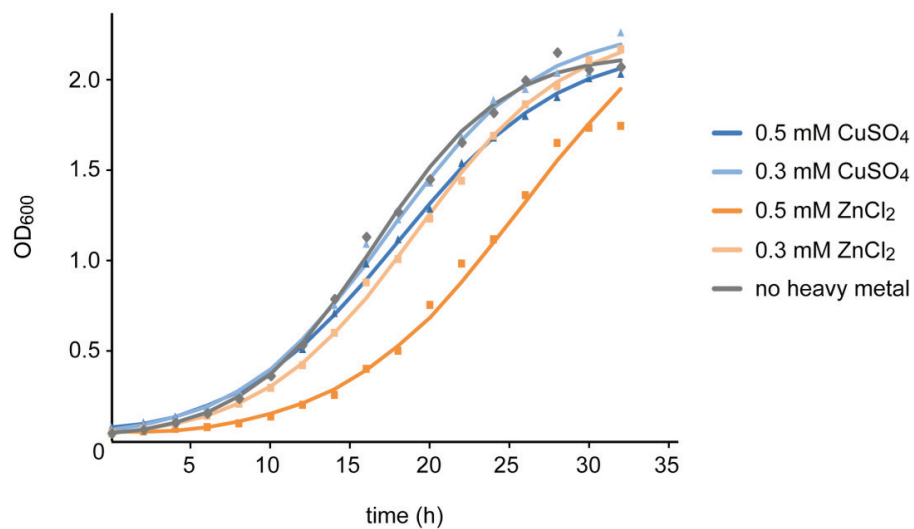

**Figure S1. Growth rates of *H. neptunium* treated with varying concentrations of different heavy metals.** A pre-culture was diluted into 20 ml MB medium, supplemented with ZnCl<sub>2</sub> or CuSO<sub>4</sub>, respectively, at the indicated concentrations, to obtain an initial OD<sub>600</sub> of ~0.1. Cell growth was then monitored over 32 h. The data were fitted as described previously (Huang, 2011; see main text).

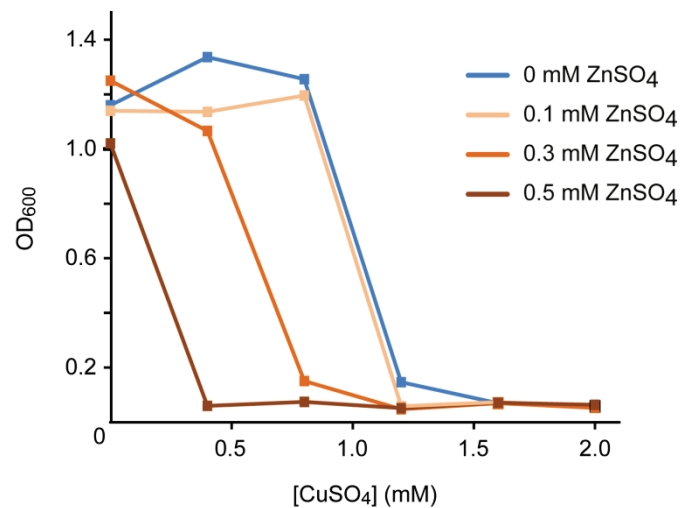

**Figure S2. Combined effect of copper and zinc on the growth of *H. neptunium*.** MB medium supplemented with the indicated concentrations of CuSO<sub>4</sub> and ZnSO<sub>4</sub> was inoculated with a pre-culture of *H. neptunium* (initial OD<sub>600</sub> = 0.05). Growth was assessed spectrophotometrically after 24 h of incubation.

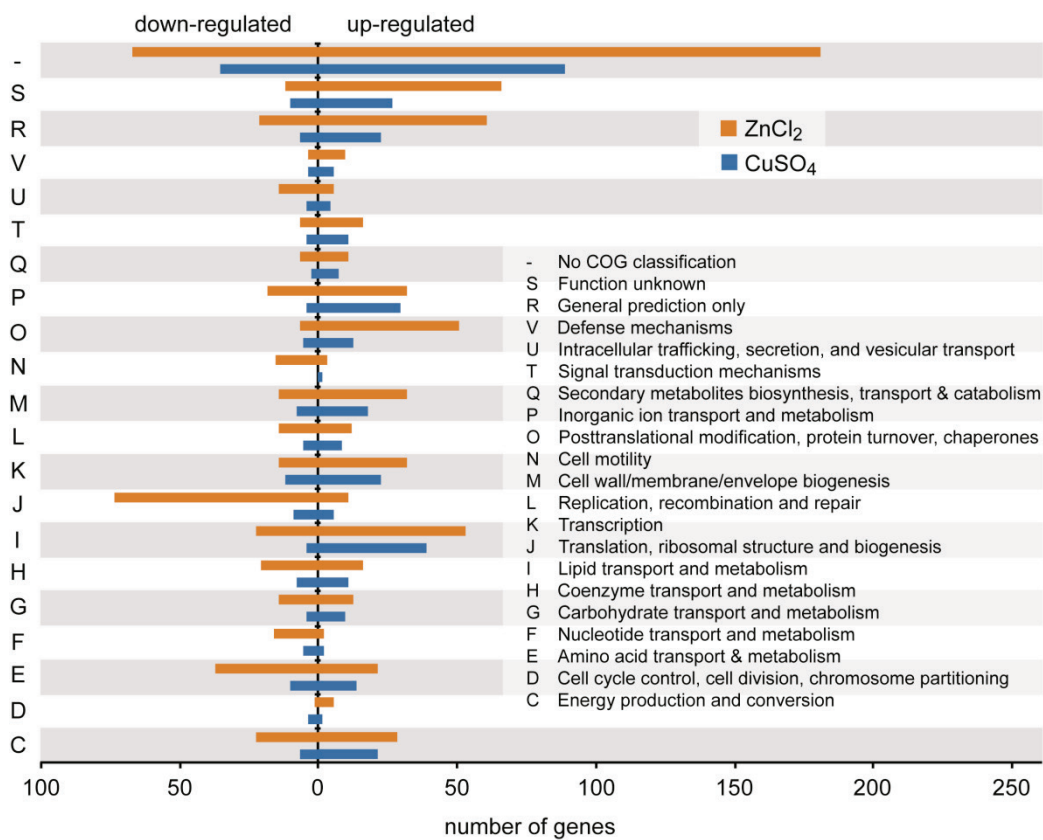

**Figure S3. Genes significantly regulated in conditions of heavy metal stress.** Functional classification of genes that were significantly regulated in cells treated for 60 min with ZnCl<sub>2</sub> and CuSO<sub>4</sub>, respectively, according to their COG categories.

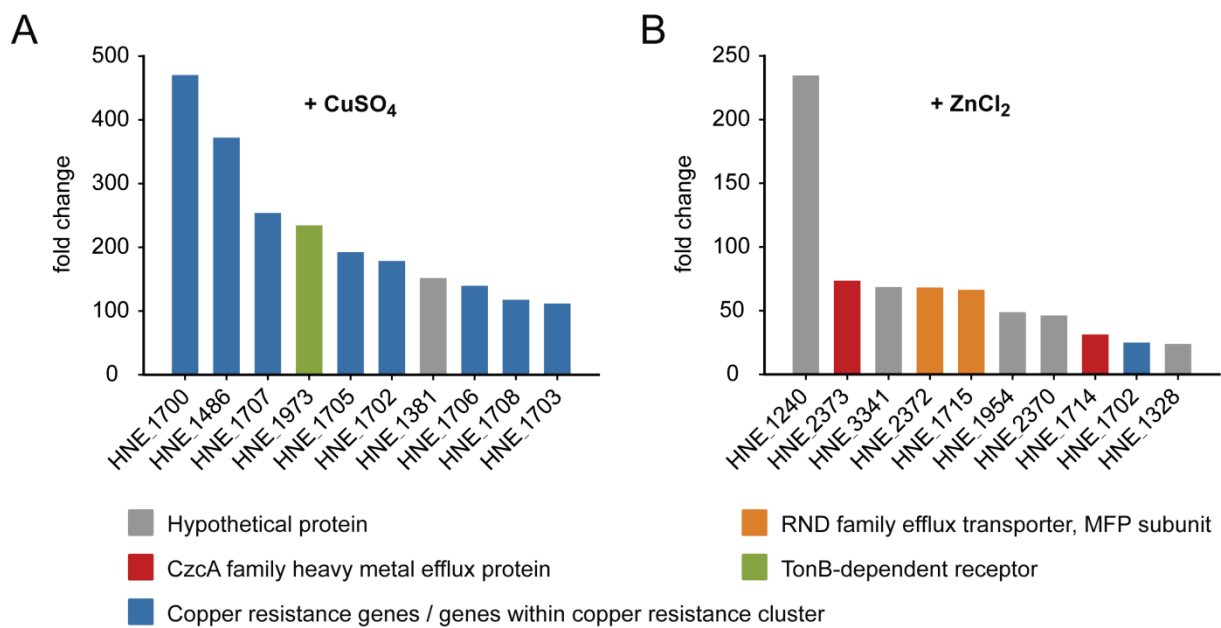

**Figure S4. Genes most highly up-regulated under heavy metal stress.** The graph shows the changes observed in the transcript levels of the ten genes that are most highly up-regulated after a 20-min pulse of ZnCl<sub>2</sub> or CuSO<sub>4</sub> (0.5 mM), respectively. The color of the bars indicates the putative function of the corresponding proteins.

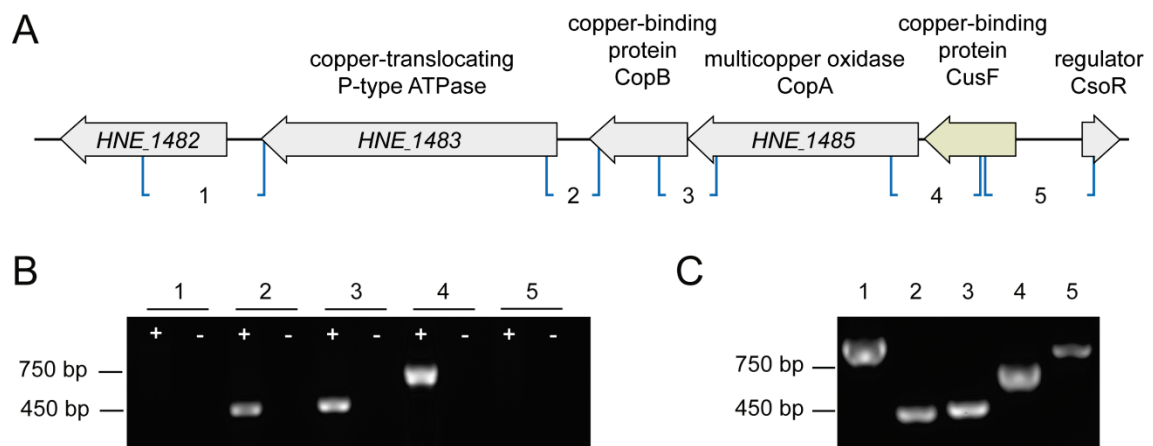

**Figure S5. Mapping of the *HNE\_1486-HNE\_1483* operon.** (A) Genomic context of *HNE\_1486*. Blue bars indicate the annealing sites of PCR primers (see Table S1). Numbers between brackets refer to the identity of the PCR products shown in (B) and (C). (B) Operon mapping. Cells were induced for 30 min with 500  $\mu$ M  $\text{CuSO}_4$ . Total RNA was extracted and reverse-transcribed into cDNA, which was then used as a template for PCR reactions with primer pairs flanking all intergenic regions in the cluster (+). PCR reactions on samples, in which no reverse transcriptase had been added in the cDNA synthesis step served as negative controls (-). PCR products were analysed on a 1% agarose gel. (C) Positive controls for the PCR reactions. Shown are the products of PCR reactions performed with the same primers as in (B) and chromosomal DNA of *H. neptunium* as a template.

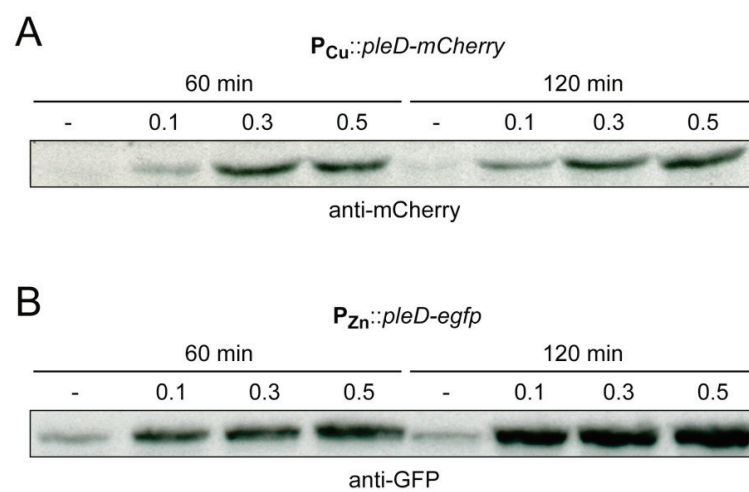

**Figure S6. Dependence of  $P_{Cu}$  and  $P_{Zn}$  activity on the heavy metal concentration. (A)** Analysis of  $P_{Cu}$ . Cells of strain EC85 ( $P_{Cu}::P_{Cu}-HNE_{2284}-mCherry$ ) were grown to exponential phase in MB medium and induced with the indicated concentrations (in mM) of  $CuSO_4$ . At the indicated time points, samples were taken and subjected to immunoblot analysis with an anti-mCherry antibody. **(B)** Analysis of  $P_{Zn}$ . Cells of strain SE107 ( $P_{Zn}::P_{Zn}-HNE_{2284}-egfp$ ) were induced with the indicated concentrations of  $ZnSO_4$  and analyzed by immunoblotting with an anti-GFP antibody.
